# Supplementary material
Source: Elsevier journal article supplement (https://www.sciencedirect.com/science/article/pii/S030028962100346X)
Supplement: mmc1 [file S030028962100346X:mmc1.pdf]

**Técnica de recogida de la información: Cuestionario online**

**Duración estimada: 30'**

[Instrucciones de programación en AZUL](#)

Antes de empezar la entrevista, me gustaría recordarle que Ipsos Healthcare es una empresa de investigación de mercados independiente y por ello le animamos a que sea abierto y honesto en sus respuestas. Su opinión es muy importante para nosotros y beneficiará el propósito de este proyecto. Le garantizamos la más absoluta confidencialidad en el tratamiento de la información facilitada, sus datos sólo serán utilizados en el marco de este estudio de mercado. Ipsos Healthcare opera conforme a la Ley Orgánica 15/1999, de Protección de Datos de Carácter Personal y a las normas del Código de práctica de ESOMAR Internacional (European Society for Opinion and Market Research). Ningún informe o documento que se genere a raíz de este estudio hará mención o identificará su nombre o su información personal.

Ipsos y el patrocinador de este proyecto son plenamente conscientes que aún estamos sufriendo la pandemia de la COVID-19 y que profesionales sanitarios, pacientes, cuidadores y la sociedad, en general, está centrada en su propia salud y en la de sus familiares. Por todo ello, reconocemos, más que nunca, lo valioso de su tiempo y, de ninguna forma, queremos que se sienta obligado a participar en el proyecto que a continuación le exponemos. En la misma línea, entenderíamos perfectamente si necesita aplazar o cancelar esta entrevista.

**R1. ¿Podemos continuar y hacerle algunas preguntas para ver si es usted apto para participar en este estudio?**

|    |                                     |
|----|-------------------------------------|
| Sí | 1 <a href="#">CONTINUAR</a>         |
| No | 2 <a href="#">FIN DE ENTREVISTA</a> |

Si accede a la siguiente pantalla, usted confirmará que ha leído, entendido y aceptado los puntos más arriba especificados y que desea participar en esta investigación de mercados.

## **SITUACIÓN PRE-COVID**

### **EN EL ENCABEZADO MOSTRAR EL TÍTULO DEL CAPÍTULO**

Las siguientes preguntas hacen referencia a la situación de la Unidad de Neumología de su hospital antes de la pandemia por COVID-19.

P1. Antes de la pandemia por COVID-19, ¿cuántas **camas** tenía asignadas la **unidad de Neumología** de su hospital?

**RESPUESTA NUMÉRICA. RANGO 1 A 99**

..... camas unidad Neumología

P2. Antes de la pandemia por COVID-19, ¿su Servicio de Neumología **contaba con una UCRI** (Unidad de Cuidados Respiratorios Intermedios)?

En la definición de UCRI incluimos todas aquellas áreas de monitorización y tratamiento de pacientes con insuficiencia respiratoria en las que pueda llevarse a cabo la monitorización cardiorrespiratoria y/o el tratamiento mediante ventilación mecánica. Por lo tanto, también incluimos las UMIR.

**RESPUESTA ÚNICA**

Si ..... 1  
No ..... 2

**SÓLO SI P2 = 1**

P3. Antes de la pandemia por COVID-19, ¿cuántas **camas** tenía la UCRI de su hospital?

**RESPUESTA NUMÉRICA. RANGO 1 A 99**

..... camas

**SÓLO SI P2 = 1**

P4. Antes de la pandemia por COVID-19, la UCRI de su hospital estaba **situada en un espacio...**

**RESPUESTA MÚLTIPLE.**

**INCOMPATIBILIDAD DE RESPUESTAS ENTRE CÓDIGOS 1 Y 2 Y CÓDIGOS 3 Y 4.**

Único ..... 1  
Compartido ..... 2  
Abierto ..... 3  
Cerrado..... 4

**SÓLO SI P2 = 1**

P5. Indique el **material** con el que estaba equipada la **UCRI** de su hospital antes de la pandemia por COVID-19.

**RESPUESTA MÚLTIPLE. ROTAR OPCIONES DE RESPUESTA**

Monitorización ..... 1  
Broncoscopio Flexible (BF) ..... 2  
Ecógrafo ..... 3  
Gasómetro.. ..... 4  
Capnógrafo. .... 5

SÓLO SI P2 = 1

P6. Antes de la pandemia por COVID-19, ¿cuál era el **ratio de enfermería/paciente** en la UCRI de su hospital?

Es decir, había una persona de enfermería por cada

**RESPUESTA NUMÉRICA. RANGO 1 A 99**

....pacientes

SÓLO SI P2 = 1

P7. Antes de la pandemia por COVID-19, en la UCRI de su hospital, ¿**existía un FEA** (Facultativo Especialista de Área) **de Neumología**?

**RESPUESTA ÚNICA**

- Si ..... 1  
No ..... 2

SÓLO SI P7=1

P8. ¿En qué **turno** trabajaba ese **FEA** de Neumología?

**RESPUESTA ÚNICA**

- 24 horas presenciales ..... 1  
24 horas localizadas..... 2  
12 horas presenciales ..... 3  
Otros (especificar) ..... 8

SÓLO SI P2 = 1

P9. Indique cuál/es de los siguientes **profesionales trabajaban en la UCRI** de su hospital antes de la pandemia por COVID-19

**RESPUESTA MÚLTIPLE. ROTAR RESPUESTAS EXCEPTO CÓDIGO 8**

- Endocrino ... ..... 1  
Fisioterapeuta..... 2  
Rehabilitación ..... 3  
Otros profesionales (especificar)..... 8

SÓLO SI P2 = 1

P10. Indique cuál/es de las siguientes **terapias estaban disponibles en la UCRI** de su hospital antes de la pandemia por COVID-19

**RESPUESTA MÚLTIPLE. ROTAR RESPUESTAS**

- ONAF (Oxigenoterapia Nasal de Alto Flujo) ..... 1  
CPAP (presión positiva continua en la vía aérea) alto flujo ..... 2  
VMNI (Ventilación Mecánica No Invasiva) con respiradores de doble rama ..... 3  
VMNI (Ventilación Mecánica No Invasiva) con respiradores domiciliarios mono-rama ..... 4  
VMI (Ventilación No Invasiva) a través de traqueotomía ..... 5  
Proceso de destete en pacientes traqueostomizados tras UCI ..... 6  
CPAP (presión positiva continua en la vía aérea) alto flujo no homologados ..... 7

**PANDEMIA COVID**

Ahora se incluyen una serie de cuestiones relativas a la situación de la Unidad de Neumología de su hospital **durante de la pandemia por COVID-19.**

**EN EL ENCABEZADO MOSTRAR EL TÍTULO DEL CAPÍTULO**

P11. Indique cuál/es de los siguientes **espacios se han creado/ampliado** en su hospital **con motivo de la pandemia por COVID-19.**

**RESPUESTA MÚLTIPLE. ROTAR RESPUESTAS**

|                                                                                                                |   |
|----------------------------------------------------------------------------------------------------------------|---|
| Áreas específicas COVID a cargo de Neumología .....                                                            | 1 |
| Áreas específicas COVID multidisciplinares (Medicina Interna, infecciosos, especialidades médicas...) .....    | 2 |
| Área, en la UCRI, de atención a pacientes COVID con necesidad de SRNI (Soporte Respiratorio No Invasivo) ..... | 3 |

**SÓLO SI P2=2 (NO EXISTENCIA UCRI PRE-COVID)**

P12. Con motivo de la pandemia por COVID-19, **¿se ha creado en su hospital una UCRI?**

|          |   |
|----------|---|
| Si ..... | 1 |
| No ..... | 2 |

**SÓLO SI P2=1 (EXISTENCIA UCRI PRE-COVID)**

P13. Con motivo de la pandemia por COVID-19, en su hospital, **¿se ha ampliado la UCRI** ya existente?

|          |   |
|----------|---|
| Si ..... | 1 |
| No ..... | 2 |

**SÓLO SI P12=1 ó P13=1**

P14. ¿Cuál/es de los siguientes **elementos de monitorización se han instalado** en la UCRI su hospital **con motivo de la pandemia por COVID-19.**

**RESPUESTA MÚLTIPLE. ROTAR RESPUESTAS**

|                                   |   |
|-----------------------------------|---|
| Monitores multiparamétricos ..... | 1 |
| Pulsioximetría .....              | 2 |

**SÓLO SI P12=1 ó P13=1**

P15. Indique el **material** con el que ha estado equipada la **UCRI** de su hospital **durante el pico** de la pandemia por COVID-19.

**RESPUESTA MÚLTIPLE. ROTAR RESPUESTAS**

|                                  |   |
|----------------------------------|---|
| Monitorización .....             | 1 |
| Broncoscopio Flexible (BF) ..... | 2 |
| Ecógrafo .....                   | 3 |
| Gasómetro .....                  | 4 |
| Capnógrafo .....                 | 5 |

P16. **Durante el pico** de la pandemia por COVID-19, ¿cuántas **camas monitorizadas** existen en el Servicio de Neumología de su hospital?

**RESPUESTA NUMÉRICA. RANGO 1 A 99**

..... camas

SÓLO SI P12=1 ó P13=1

P18. **Durante el pico** la pandemia por COVID-19, ¿cuál ha sido el **ratio de enfermería/paciente** en la UCRI de su hospital?

Es decir, había una persona de enfermería por cada

....pacientes

SÓLO SI P12=1 ó P13=1

P19. **Durante el pico** la pandemia por COVID-19, en la UCRI de su hospital, ¿**se ha contado con un FEA** (Facultativo Especialista de Área) **de Neumología**?

RESPUESTA ÚNICA

Si ..... 1  
No ..... 2

SÓLO SI P19=1

P20. ¿En qué **turno** trabajaba ese **FEA** de Neumología?

RESPUESTA ÚNICA

24 horas presenciales ..... 1  
24 horas localizadas..... 2  
12 horas presenciales ..... 3  
Otros (especificar) ..... 8

SÓLO SI P12=1 ó P13=1

P21. Indique cuál/es de los siguientes **profesionales han trabajado en la UCRI** de su hospital durante el pico de la pandemia por COVID-19.

RESPUESTA MÚLTIPLE. ROTAR RESPUESTAS EXCEPTO CÓDIGO 8

Endocrino ... ..... 1  
Fisioterapeuta ..... 2  
Rehabilitación ..... 3  
Otros profesionales (especificar) ..... 8

SÓLO SI P12=1 ó P13=1

P22. Indique cuál/es de las siguientes **terapias están disponibles en la UCRI** de su hospital durante el pico de la pandemia por COVID-19

RESPUESTA MÚLTIPLE. ROTAR RESPUESTAS

ONAF (Oxigenoterapia Nasal de Alto Flujo) ..... 1  
CPAP (presión positiva continua en la vía aérea) alto flujo ..... 2  
VMNI (Ventilación Mecánica No Invasiva) con respiradores de doble rama ..... 3  
VMNI (Ventilación Mecánica No Invasiva) con respiradores domiciliarios mono-rama ..... 4  
VMI (Ventilación No Invasiva) a través de traqueotomía ..... 5  
Proceso de destete en pacientes traqueostomizados tras UCI ..... 6  
CPAP (presión positiva continua en la vía aérea) alto flujo no homologados ..... 7

**CONTEXTO EPIDEMIOLÓGICO DE SU ÁREA SANITARIA**

En este bloque de preguntas le solicitaremos algunas cifras relativas a la pandemia por COVID-19 y al número de actuaciones realizadas.

P23. Aproximadamente, hasta la fecha, **como consecuencia de la pandemia** por COVID-19 indique el número de...

**RESPUESTA NUMÉRICA. RANGO 0 A 9999**

|                                                                                                                                                | Nº TOTAL |
|------------------------------------------------------------------------------------------------------------------------------------------------|----------|
| <b>Contagios</b> de COVID-19 en su <b>área sanitaria</b> (provincia)                                                                           |          |
| <b>Ingresos</b> en su <b>hospital</b> por COVID-19                                                                                             |          |
| <b>Ingresos</b> COVID-19 a cargo de la <b>Unidad de Neumología</b> de su hospital (UCRI, sala monitorización, hospitalización convencional...) |          |
| <b>Pacientes valorados</b> en la <b>Unidad de Neumología</b> de su hospital como consecuencia de la pandemia de COVID-19                       |          |
| <b>Ingresos</b> en la <b>UCI</b> de su <b>hospital</b>                                                                                         |          |

P24. Durante la pandemia, en la Unidad de Neumología de su hospital, ¿cuál ha sido la **estancia media de hospitalización** de los afectados por COVID-19?

**RESPUESTA NUMÉRICA. RANGO 1 A 99**

..... días

P25. De los .... (**INSERTAR RESPUESTA EN P23\_4**) pacientes que han sido valorados en su Unidad de Neumología, aproximadamente, ¿**qué porcentaje tenían techo terapéutico y qué porcentaje, no tenía techo terapéutico?**

**RESPUESTA NUMÉRICA. RANGO 0 A 100**

|                              | % PACIENTES                |
|------------------------------|----------------------------|
| <b>Con</b> techo terapéutico | %                          |
| <b>Sin</b> techo terapéutico | %                          |
|                              | <b>CONTROL SUMA = 100%</b> |

**SÓLO SI P25\_2 (SIN TECHO TERAPÉUTICO) > 0**

P26. ¿Cuál ha sido la **estancia media de hospitalización** de los pacientes sin techo terapéutico trasladado a ella?

**RESPUESTA NUMÉRICA. RANGO 1 A 99**

..... días

**SÓLO SI P25\_2 (SIN TECHO TERAPÉUTICO) > 0**

P27. Aproximadamente, hasta la fecha, como consecuencia de la pandemia por COVID-19, en la Unidad de Neumología de su hospital, ¿cuántos **pacientes sin techo terapéutico** han sido ...

**RESPUESTA NUMÉRICA. RANGO 0 A 9999**

|                                                                                                | Nº PACIENTES |
|------------------------------------------------------------------------------------------------|--------------|
| Iniciados con ONAF (Oxigenoterapia Nasal de Alto Flujo)                                        |              |
| Tratados con VMNI (Ventilación Mecánica No Invasiva)                                           |              |
| Tratados con CPAP (presión positiva continua en la vía aérea) alto flujo homologados           |              |
| Tratados con CPAP (presión positiva continua en la vía aérea) alto flujo montaje no homologado |              |
| Trasladados a UCI                                                                              |              |
| Tratados con IOT (oscilación forzada)                                                          |              |
| Dados de alta                                                                                  |              |
| Éxitus                                                                                         |              |

**SÓLO SI P27\_5 (TRALADADOS A UCI) > 0**

P28. ¿Cuál ha sido la **estancia media en la UCI** de los **(INSERTAR RESPUESTA EN P27\_5) pacientes sin techo terapéutico trasladados a ella?**

**RESPUESTA NUMÉRICA. RANGO 1 A 99**

..... Días

**SÓLO SI P25\_1 (CON TECHO TERAPÉUTICO) > 0**

P29. ¿Cuál ha sido la **estancia media de hospitalización** de los **pacientes con techo terapéutico?**

**RESPUESTA NUMÉRICA. RANGO 1 A 99**

..... días

**SÓLO SI P25\_1 (CON TECHO TERAPÉUTICO) > 0**

P30. Aproximadamente, hasta la fecha, como consecuencia de la pandemia por COVID-19, en la Unidad de Neumología de su hospital, ¿cuántos **pacientes con techo terapéutico** han sido ...

**RESPUESTA NUMÉRICA. RANGO 0 A 9999**

|                                                                                                | Nº PACIENTES |
|------------------------------------------------------------------------------------------------|--------------|
| Iniciados con ONAF (Oxigenoterapia Nasal de Alto Flujo)                                        |              |
| Tratados con VMNI (Ventilación Mecánica No Invasiva)                                           |              |
| Tratados con CPAP (presión positiva continua en la vía aérea) alto flujo homologados           |              |
| Tratados con CPAP (presión positiva continua en la vía aérea) alto flujo montaje no homologado |              |
| Dados de alta                                                                                  |              |
| Éxitus                                                                                         |              |

### **SITUACIÓN POST- COVID**

Ahora se incluyen unas preguntas en las que solicitamos su opinión sobre la posible situación tras la pandemia por COVID-19.

P31. **Una vez se controle** la pandemia por COVID-19, **¿se mantendrá la UCRI en funcionamiento?**

**RESPUESTA ÚNICA**

- Sí, con la misma dotación y personal que durante el COVID-19..... 1  
Sí pero reduciendo la dotación y el personal ..... 2  
No ..... 3  
No lo sé ..... 4

P32. ¿Se ha **planteado** en su hospital la **creación/mejora** de una UCRI **limpia** para los **pacientes no COVID?**

**RESPUESTA ÚNICA**

- Sí ..... 1  
No ..... 2

P34. Para terminar, por favor, indique, según su opinión, cuáles cree que son las **principales ventajas de contar con una UCRI para tratar a pacientes con COVID.**

**RESPUESTA ABIERTA**

### **CLASIFICACIÓN**

C4. Indique su cargo en el **hospital...**

**RESPUESTA ÚNICA**

- Residente ... ..... 1  
Adjunto ..... 2  
Jefe de Sección ..... 3  
Jefe de Servicio ..... 4  
FEA Neumología ..... 5  
Coordinador Unidad Neumología ..... 6

**FIN DE ENTREVISTA. AGRADECER COLABORACIÓN**
